# Supplementary material
Source: Springer Nature journal article supplement (https://www.springermedizin.de/resource/supplementary/12878_2011_54_MOESM1_ESM.pdf/9441630)

5'-CCTGAGGAGAAGTCTGCCGTT-3'

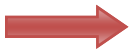

Exon I

IVS-1

Exon 2

IVS-2

Exon3

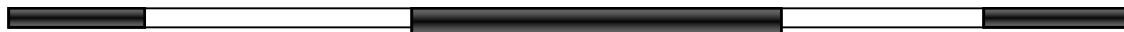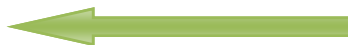

5'-CATCACTAAAGGCACGCACT-3'

*MnlI*

57bp

171bp

106bp

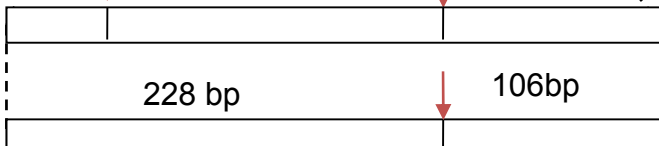

Digested products of  $\beta^A$

Digested products of  $\beta^E$

**Figure 2**

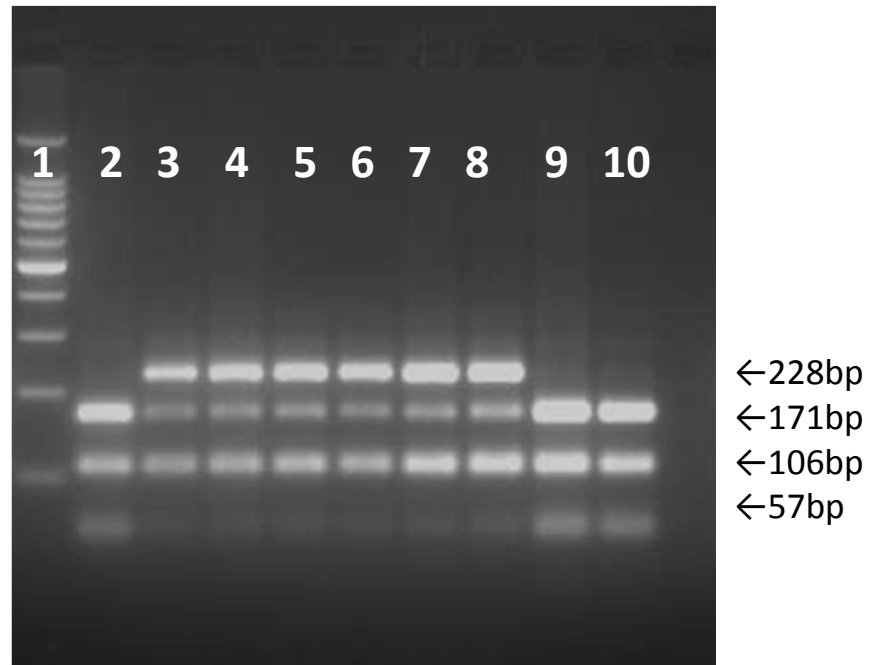

Supplement: MOESM1 [file 9441630]
